# Supplementary material
Source: MDPI journal article supplement (https://www.mdpi.com/2073-4441/15/1/69)
Supplement: s1 [file s1]

## Interactive effects of nutrients and salinity on phytoplankton in subtropical plateau lakes of contrasting water depth

Ying Wang; Xia Jiang; Yan-Ling Li; Li-Juan Yang; Ye-Hao Li; Ying Liu; Long Zhou; Pu-Ze Wang; Xu Zhao; Hai-Jun Wang; Erik Jeppesen; Ping Xie.

\*Corresponding author. Email: wanghaijun@ynu.edu.cn

Table S1 Results of GAM model parameters for TN, TP, and Cond relative to phytoplankton variables in the studied lakes.

|          | Response variables  | Explanatory variables | Species | edf   | F      | P       | dev,expl (%) | R <sup>2</sup> | k |
|----------|---------------------|-----------------------|---------|-------|--------|---------|--------------|----------------|---|
| Figure 2 | Species Number (SN) | TN                    | total   | 1.659 | 101.10 |         | 38.70        | 0.383          | 3 |
|          |                     |                       | Cyna    | 1.973 | 199.60 | < 0.001 | 58.20        | 0.580          |   |
|          |                     |                       | Chlo    | 1.561 | 95.27  |         | 36.20        | 0.359          |   |
|          |                     |                       | Baci    | 1.872 | 4.11   | 0.023   | 2.94         | 0.023          |   |
|          |                     | TP                    | total   | 1.785 | 84.82  |         | 35.50        | 0.351          |   |
|          |                     |                       | Cyna    | 1.933 | 69.71  | < 0.001 | 32.00        | 0.315          |   |
|          |                     |                       | Chlo    | 1.181 | 135.1  |         | 37.70        | 0.374          |   |
|          |                     |                       | Baci    | 1.000 | 0.075  | 0.784   | 0.03         | 0.003          |   |
|          |                     | Cond                  | total   | 1.988 | 58.91  |         | 29.20        | 0.287          |   |
|          |                     |                       | Cyna    | 1.992 | 106.6  | < 0.001 | 42.60        | 0.422          |   |
|          |                     |                       | Chlo    | 1.979 | 53.67  |         | 27.50        | 0.270          |   |
|          |                     |                       | Baci    | 1.918 | 25.7   |         | 14.80        | 0.143          |   |

|           |         |      |       |       |        |         |       |       |   |
|-----------|---------|------|-------|-------|--------|---------|-------|-------|---|
| Figure S3 | Density | TN   | total | 1.835 | 298.10 | < 0.001 | 66.50 | 0.663 | 3 |
|           |         |      | Cyna  | 1.000 | 579.80 |         | 66.60 | 0.665 |   |
|           |         |      | Chlo  | 1.915 | 126.80 |         | 46.10 | 0.458 |   |
|           |         |      | Baci  | 1.847 | 96.10  |         | 39.90 | 0.395 |   |
|           |         | TP   | total | 1.982 | 171.90 |         | 54.10 | 0.538 |   |
|           |         |      | Cyna  | 1.982 | 154.50 |         | 51.40 | 0.511 |   |
|           |         |      | Chlo  | 1.925 | 159.90 |         | 52.00 | 0.517 |   |
|           |         |      | Baci  | 1.904 | 60.12  |         | 29.60 | 0.291 |   |
|           |         | Cond | total | 1.997 | 257.80 |         | 64.10 | 0.638 |   |
|           |         |      | Cyna  | 1.998 | 288.10 |         | 66.60 | 0.664 |   |
|           |         |      | Chlo  | 1.992 | 89.92  |         | 38.60 | 0.382 |   |
|           |         |      | Baci  | 1.992 | 66.95  |         | 32.80 | 0.323 |   |
| Figure 3  | Biomass | TN   | total | 1.934 | 168.40 |         | 53.30 | 0.530 |   |
|           |         |      | Cyna  | 1.429 | 336.20 |         | 66.50 | 0.664 |   |
|           |         |      | Chlo  | 1.883 | 34.80  |         | 18.70 | 0.182 |   |
|           |         |      | Baci  | 1.626 | 125.90 |         | 44.90 | 0.445 |   |
|           |         | TP   | total | 1.983 | 167.70 |         | 53.50 | 0.532 |   |
|           |         |      | Cyna  | 1.983 | 166.50 |         | 53.30 | 0.530 |   |
|           |         |      | Chlo  | 1.891 | 77.25  |         | 34.10 | 0.336 |   |
|           |         |      | Baci  | 1.899 | 71.65  |         | 33.40 | 0.329 |   |
|           |         | Cond | total | 1.996 | 161.90 |         | 52.90 | 0.526 |   |
|           |         |      | Cyna  | 1.998 | 295.80 |         | 67.20 | 0.669 |   |
|           |         |      | Chlo  | 1.973 | 26.23  |         | 15.80 | 0.153 |   |
|           |         |      | Baci  | 1.993 | 72.48  |         | 34.60 | 0.341 |   |

|           |                                  |                |      |       |        |         |       |       |   |
|-----------|----------------------------------|----------------|------|-------|--------|---------|-------|-------|---|
| Figure 4  | Percentage shares of density (%) | TN             | Cyna | 2.650 | 114.10 | < 0.001 | 53.40 | 0.530 | 4 |
|           |                                  |                | Chlo | 2.535 | 79.28  |         | 44.30 | 0.438 |   |
|           |                                  | TP             | Cyna | 2.567 | 28.35  |         | 23.70 | 0.230 | 5 |
|           |                                  |                | Chlo | 2.760 | 15.74  |         | 15.70 | 0.149 |   |
|           |                                  | Cond           | Cyna | 1.992 | 122.80 |         | 46.10 | 0.457 | 3 |
|           |                                  |                | Chlo | 1.988 | 68.72  |         | 32.50 | 0.320 |   |
|           | Percentage shares of biomass (%) | TN             | Cyna | 2.966 | 61.67  | < 0.001 | 42.90 | 0.423 | 5 |
|           |                                  |                | Chlo | 2.113 | 52.88  |         | 32.70 | 0.322 |   |
|           |                                  | TP             | Cyna | 3.743 | 27.82  |         | 27.70 | 0.268 |   |
|           |                                  |                | Chlo | 3.798 | 10.21  |         | 12.90 | 0.117 |   |
|           |                                  | Cond           | Cyna | 1.992 | 86.41  |         | 37.60 | 0.372 |   |
|           |                                  |                | Chlo | 1.986 | 44.50  |         | 23.80 | 0.233 |   |
| Figure S4 | TN:TP                            | TP             |      | 1.343 | 47.72  | 0.116   | 19.70 | 0.193 | 3 |
|           |                                  | Z <sub>M</sub> | /    | 1.775 | 1.91   |         | 1.80  | 0.012 |   |
|           |                                  | Cond           |      | 1.855 | 11.03  |         | 6.73  | 0.061 |   |

Table S2 Results of summer GAM model parameters for TN, TP and Cond relative to phytoplankton variables in the studied lakes.

|           | Response variables  | Explanatory variables | Species | edf   | F      | P       | dev,expl (%) | R <sup>2</sup> | k |
|-----------|---------------------|-----------------------|---------|-------|--------|---------|--------------|----------------|---|
| Figure S5 | Species number (SN) | TN                    | total   | 1.000 | 70.60  |         | 49.50        | 0.488          | 3 |
|           |                     |                       | Cyna    | 1.000 | 71.34  | < 0.001 | 49.80        | 0.491          |   |
|           |                     |                       | Chlo    | 1.386 | 50.75  |         | 52.20        | 0.513          |   |
|           |                     |                       | Baci    | 1.872 | 3.42   | 0.034   | 10.40        | 0.080          |   |
|           |                     | TP                    | total   | 1.000 | 190.80 |         | 72.60        | 0.722          |   |
|           |                     |                       | Cyna    | 1.588 | 55.13  | < 0.001 | 60.30        | 0.594          |   |
|           |                     |                       | Chlo    | 1.393 | 80.31  |         | 65.90        | 0.652          |   |
|           |                     |                       | Baci    | 1.445 | 0.64   | 0.614   | 2.10         | 0.001          |   |
|           |                     | Cond                  | total   | 1.980 | 24.39  |         | 41.20        | 0.395          |   |
|           |                     |                       | Cyna    | 1.980 | 26.42  | < 0.001 | 43.30        | 0.417          |   |
|           |                     |                       | Chlo    | 1.972 | 17.80  |         | 34.20        | 0.323          |   |
|           |                     |                       | Baci    | 1.000 | 5.48   | 0.022   | 7.26         | 0.059          |   |
| Figure S6 | Density             | TN                    | total   | 1.800 | 43.10  |         | 56.00        | 0.549          | 3 |
|           |                     |                       | Cyna    | 1.521 | 49.39  |         | 56.90        | 0.559          |   |
|           |                     |                       | Chlo    | 1.257 | 34.68  |         | 42.80        | 0.418          |   |
|           |                     |                       | Baci    | 1.863 | 16.03  |         | 34.10        | 0.323          |   |
|           |                     | TP                    | total   | 1.000 | 116.60 |         | 61.80        | 0.613          |   |
|           |                     |                       | Cyna    | 1.000 | 107.10 | < 0.001 | 59.80        | 0.592          |   |
|           |                     |                       | Chlo    | 1.483 | 98.43  |         | 71.50        | 0.709          |   |
|           |                     |                       | Baci    | 1.000 | 58.22  |         | 45.80        | 0.450          |   |
|           |                     | Cond                  | total   | 1.990 | 51.45  |         | 59.40        | 0.583          |   |
|           |                     |                       | Cyna    | 1.991 | 59.02  |         | 62.70        | 0.616          |   |
|           |                     |                       | Chlo    | 1.977 | 21.82  |         | 38.50        | 0.368          |   |
|           |                     |                       | Baci    | 1.911 | 5.66   | 0.006   | 14.90        | 0.125          |   |

|           |                                  |      |       |       |        |         |       |       |   |
|-----------|----------------------------------|------|-------|-------|--------|---------|-------|-------|---|
| Figure S7 | Biomass                          | TN   | total | 1.805 | 24.42  | < 0.001 | 42.50 | 0.411 | 3 |
|           |                                  |      | Cyna  | 1.227 | 58.11  |         | 54.30 | 0.535 |   |
|           |                                  |      | Chlo  | 1.557 | 6.32   | 0.003   | 16.80 | 0.150 |   |
|           |                                  |      | Baci  | 1.828 | 18.25  |         | 37.00 | 0.353 |   |
|           |                                  | TP   | total | 1.775 | 75.06  | < 0.001 | 66.40 | 0.655 |   |
|           |                                  |      | Cyna  | 1.000 | 117.30 |         | 62.00 | 0.614 |   |
|           |                                  |      | Chlo  | 1.000 | 65.62  |         | 47.70 | 0.470 |   |
|           |                                  |      | Baci  | 1.558 | 32.62  |         | 48.60 | 0.474 |   |
|           |                                  | Cond | total | 1.987 | 41.23  | 0.059   | 53.90 | 0.526 |   |
|           |                                  |      | Cyna  | 1.992 | 61.65  |         | 63.70 | 0.627 |   |
|           |                                  |      | Chlo  | 1.958 | 17.36  |         | 32.80 | 0.310 |   |
|           |                                  |      | Baci  | 1.855 | 3.02   |         | 9.10  | 0.066 |   |
| Figure S8 | Percentage shares of density (%) | TN   | Cyna  | 2.306 | 16.67  | < 0.001 | 39.80 | 0.379 | 4 |
|           |                                  |      | Chlo  | 1.000 | 23.37  |         | 24.50 | 0.235 |   |
|           |                                  | TP   | Cyna  | 1.000 | 15.83  | 0.007   | 18.00 | 0.169 |   |
|           |                                  |      | Chlo  | 1.000 | 7.77   |         | 9.74  | 0.085 |   |
|           |                                  | Cond | Cyna  | 1.979 | 46.95  | < 0.001 | 57.60 | 0.564 | 3 |
|           |                                  |      | Chlo  | 1.931 | 15.54  |         | 32.10 | 0.302 |   |
|           |                                  | TN   | Cyna  | 2.876 | 21.52  | 0.007   | 48.00 | 0.459 |   |
|           |                                  |      | Chlo  | 1.000 | 24.86  |         | 25.70 | 0.246 |   |
|           |                                  | TP   | Cyna  | 1.000 | 20.96  | < 0.001 | 22.50 | 0.215 | 3 |
|           |                                  |      | Chlo  | 1.000 | 7.79   |         | 9.76  | 0.085 |   |
|           |                                  | Cond | Cyna  | 1.979 | 31.54  |         | 47.80 | 0.463 |   |
|           |                                  |      | Chlo  | 1.932 | 13.73  |         | 29.50 | 0.276 |   |

Table S3 Results of GAM model parameters for TN, TP and Cond relative to phytoplankton variables based on lake-specific data of four seasons in the studied lakes.

|            | Response variables  | Explanatory variables | Species | edf   | F     | P       | dev,expl (%) | R <sup>2</sup> | k |
|------------|---------------------|-----------------------|---------|-------|-------|---------|--------------|----------------|---|
| Figure S9  | Species number (SN) | TN                    | total   | 1.000 | 25.93 |         | 46.40        | 0.446          | 3 |
|            |                     |                       | Cyna    | 1.119 | 40.17 | < 0.001 | 63.00        | 0.616          |   |
|            |                     |                       | Chlo    | 1.000 | 26.26 |         | 46.70        | 0.449          |   |
|            |                     |                       | Baci    | 1.833 | 2.56  | 0.101   | 16.80        | 0.115          |   |
|            |                     | TP                    | total   | 1.000 | 26.75 |         | 47.10        | 0.454          |   |
|            |                     |                       | Cyna    | 1.000 | 16.16 | < 0.001 | 35.00        | 0.328          |   |
|            |                     |                       | Chlo    | 1.000 | 30.95 |         | 50.80        | 0.491          |   |
|            |                     |                       | Baci    | 1.000 | 0.13  | 0.722   | 0.43         | 0.029          |   |
|            |                     | Cond                  | total   | 1.890 | 5.99  | 0.005   | 32.30        | 0.279          |   |
|            |                     |                       | Cyna    | 1.954 | 17.51 | < 0.001 | 56.10        | 0.532          |   |
|            |                     |                       | Chlo    | 1.794 | 5.38  | 0.007   | 31.00        | 0.268          |   |
|            |                     |                       | Baci    | 1.396 | 5.77  | 0.025   | 21.40        | 0.188          |   |
| Figure S10 | Density             | TN                    | total   | 1.000 | 85.58 |         | 74.00        | 0.732          | 3 |
|            |                     |                       | Cyna    | 1.000 | 83.54 |         | 73.60        | 0.727          |   |
|            |                     |                       | Chlo    | 1.160 | 37.64 |         | 61.20        | 0.597          |   |
|            |                     |                       | Baci    | 1.748 | 12.90 | < 0.001 | 44.30        | 0.410          |   |
|            |                     | TP                    | total   | 1.822 | 16.22 |         | 50.90        | 0.478          |   |
|            |                     |                       | Cyna    | 1.794 | 14.49 |         | 47.80        | 0.445          |   |
|            |                     |                       | Chlo    | 1.793 | 38.16 |         | 70.90        | 0.691          |   |
|            |                     |                       | Baci    | 1.342 | 10.89 | 0.002   | 34.60        | 0.316          |   |
|            |                     | Cond                  | total   | 1.976 | 26.74 |         | 65.60        | 0.632          |   |
|            |                     |                       | Cyna    | 1.977 | 29.17 | < 0.001 | 67..5        | 0.652          |   |
|            |                     |                       | Chlo    | 1.928 | 9.81  |         | 42.60        | 0.388          |   |
|            |                     |                       | Baci    | 1.880 | 3.60  | 0.039   | 22.10        | 0.170          |   |

|            |                                  |      |       |       |       |         |       |       |   |
|------------|----------------------------------|------|-------|-------|-------|---------|-------|-------|---|
| Figure S11 | Biomass                          | TN   | total | 1.424 | 31.48 | < 0.001 | 62.50 | 0.607 | 3 |
|            |                                  |      | Cyna  | 1.000 | 86.70 |         | 74.30 | 0.734 |   |
|            |                                  |      | Chlo  | 1.251 | 7.99  | 0.008   | 26.40 | 0.233 |   |
|            |                                  |      | Baci  | 1.827 | 13.85 |         | 47.00 | 0.437 |   |
|            |                                  | TP   | total | 1.926 | 27.33 | < 0.001 | 64.70 | 0.623 |   |
|            |                                  |      | Cyna  | 1.793 | 15.93 |         | 50.10 | 0.470 |   |
|            |                                  |      | Chlo  | 1.854 | 22.37 |         | 59.20 | 0.566 |   |
|            |                                  |      | Baci  | 1.185 | 12.78 |         | 35.10 | 0.325 |   |
|            |                                  | Cond | total | 1.966 | 16.76 | 0.129   | 54.70 | 0.517 |   |
|            |                                  |      | Cyna  | 1.980 | 31.89 |         | 69.30 | 0.672 |   |
|            |                                  |      | Chlo  | 1.723 | 1.85  |         | 15.40 | 0.104 |   |
|            |                                  |      | Baci  | 1.870 | 3.30  |         | 20.60 | 0.155 |   |
| Figure S12 | Percentage shares of density (%) | TN   | Cyna  | 2.316 | 21.88 | < 0.001 | 68.50 | 0.659 | 4 |
|            |                                  |      | Chlo  | 2.259 | 14.07 |         | 58.30 | 0.551 |   |
|            |                                  | TP   | Cyna  | 1.000 | 4.24  | 0.048   | 12.40 | 0.095 |   |
|            |                                  |      | Chlo  | 1.000 | 2.64  |         | 8.09  | 0.050 |   |
|            |                                  | Cond | Cyna  | 2.592 | 15.96 | < 0.001 | 61.30 | 0.578 | 3 |
|            |                                  |      | Chlo  | 2.695 | 11.82 |         | 54.30 | 0.499 |   |
|            |                                  | TN   | Cyna  | 1.000 | 31.31 | 0.015   | 51.10 | 0.494 | 4 |
|            |                                  |      | Chlo  | 1.273 | 13.03 |         | 37.80 | 0.352 |   |
|            |                                  | TP   | Cyna  | 1.000 | 6.68  | 0.217   | 18.20 | 0.155 |   |
|            |                                  |      | Chlo  | 1.000 | 1.59  |         | 5.02  | 0.019 |   |
|            |                                  | Cond | Cyna  | 1.946 | 11.11 | 0.002   | 45.20 | 0.415 | 3 |
|            |                                  |      | Chlo  | 1.925 | 7.23  |         | 35.50 | 0.313 |   |

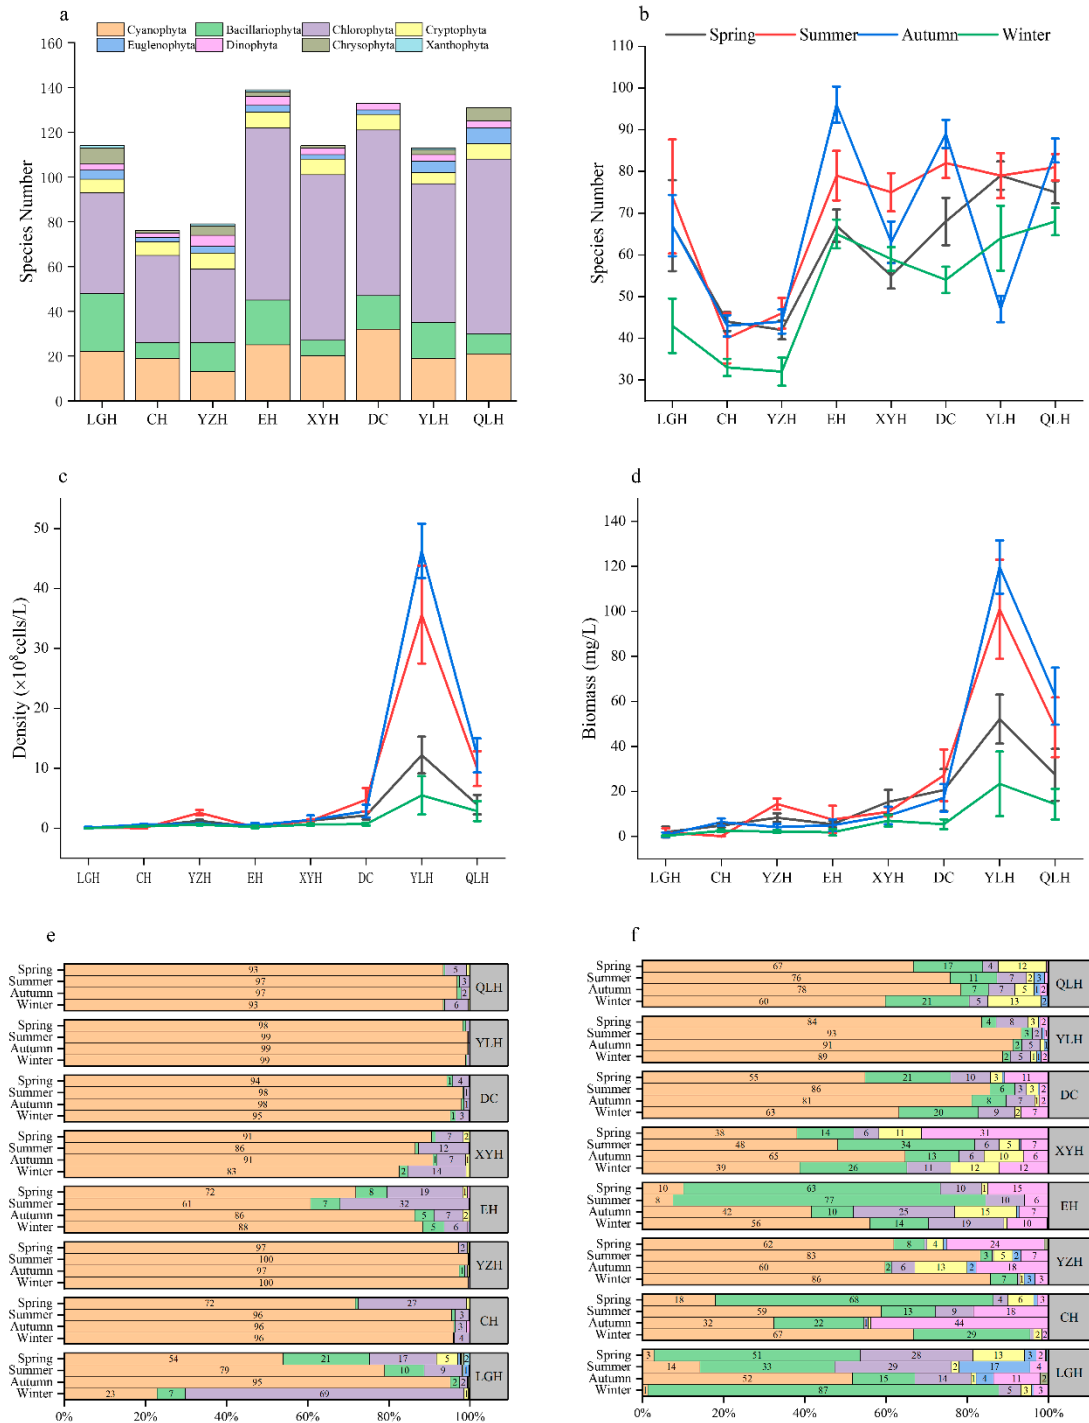

**Figure S1 Phytoplankton assemblage structure in the eight studied lakes.** Species number of the eight major taxa (a) and species number in the four seasons (b). Density (c) and biomass (d) of the main phytoplankton groups, and percentage shares of density (e) and biomass (f) of phytoplankton in the studied lakes in the four seasons. Explanation of lake name abbreviations are given in Figure 1. The lakes are sorted from left to right by nutrient status from lowest to highest.



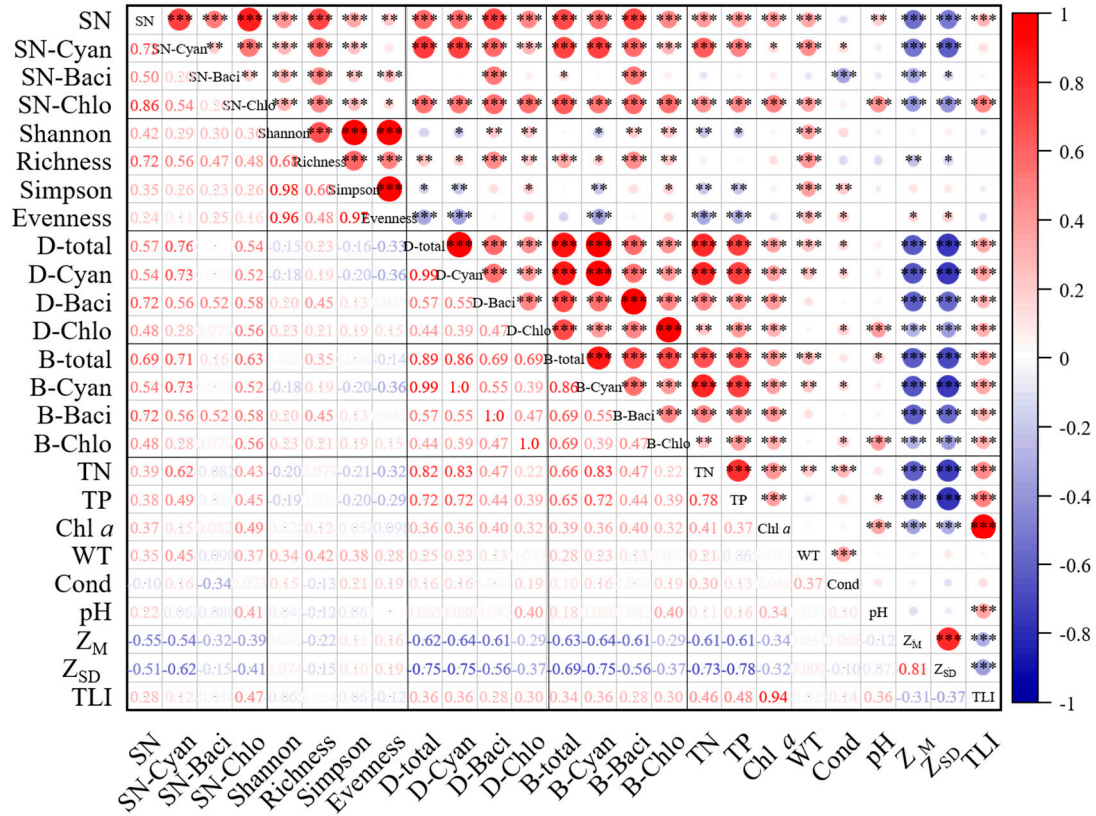

**Figure S2 Spearman correlation analysis of the relationship between phytoplankton and environmental factors (\* $P \leq 0.05$ , \*\* $P \leq 0.01$ , \*\*\* $P \leq 0.001$ ).**

SN, species number; Cyanophyta, Cyan; Chlorophyta, Chlo; Bacillariophyta, Baci; D, density; B, biomass; TN, total nitrogen; TP, total phosphorus; Chl *a*, phytoplankton chlorophyll *a*; WT, water temperature; Cond, conductivity; Z<sub>M</sub>, mean depth; Z<sub>SD</sub>, Secchi depth.

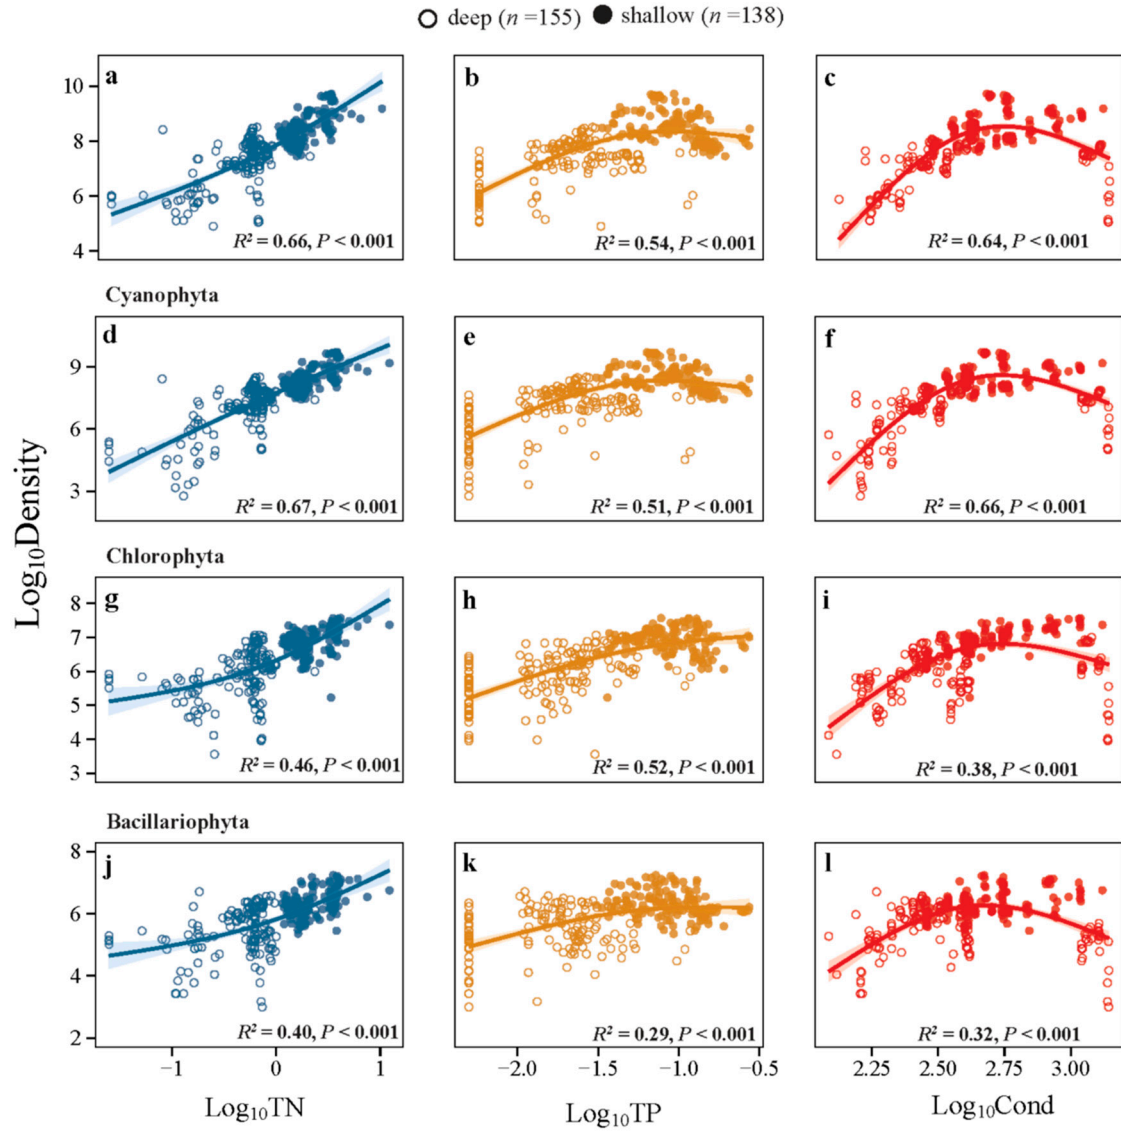

**Figure S3** Generalized additive model results showing the relationships of TN, TP, and Cond with Density (a-c), total (a-c), Cyanophyta (d-f), Chlorophyta (g-i), and Bacillariophyta (j-l) in the studied lakes See Figure 3 and Table S2 for model parameters used in the classification of deep and shallow lakes.

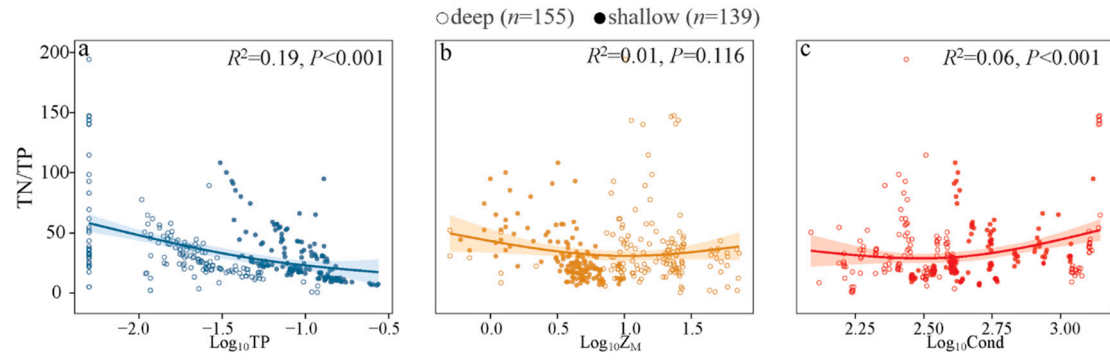

**Figure S4** Generalized additive model results showing the relationships of TP,  $Z_M$ , and Cond with TN/TP in the studied lakes. See Figure 3 and Table S2 for model parameters used in the classification of deep and shallow lakes.

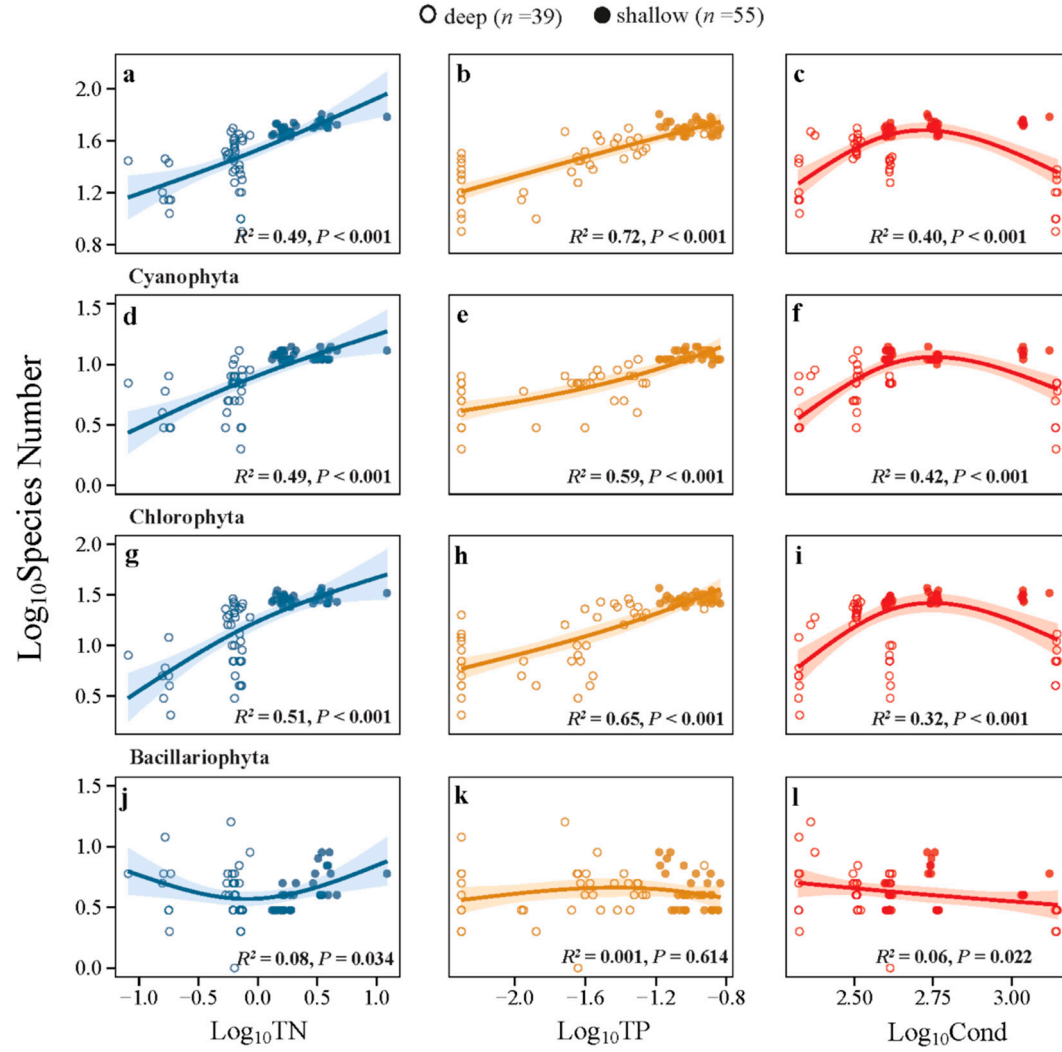

**Figure S5 Generalized additive model showing the summer relationships of TN, TP, and Cond with Species number: total (a-c), Cyanophyta (d-f), Chlorophyta (g-i), and Bacillariophyta (j-l) in the studied lakes. See Figure 3 and Table S2 for model parameters used in the classification of deep and shallow lakes.**

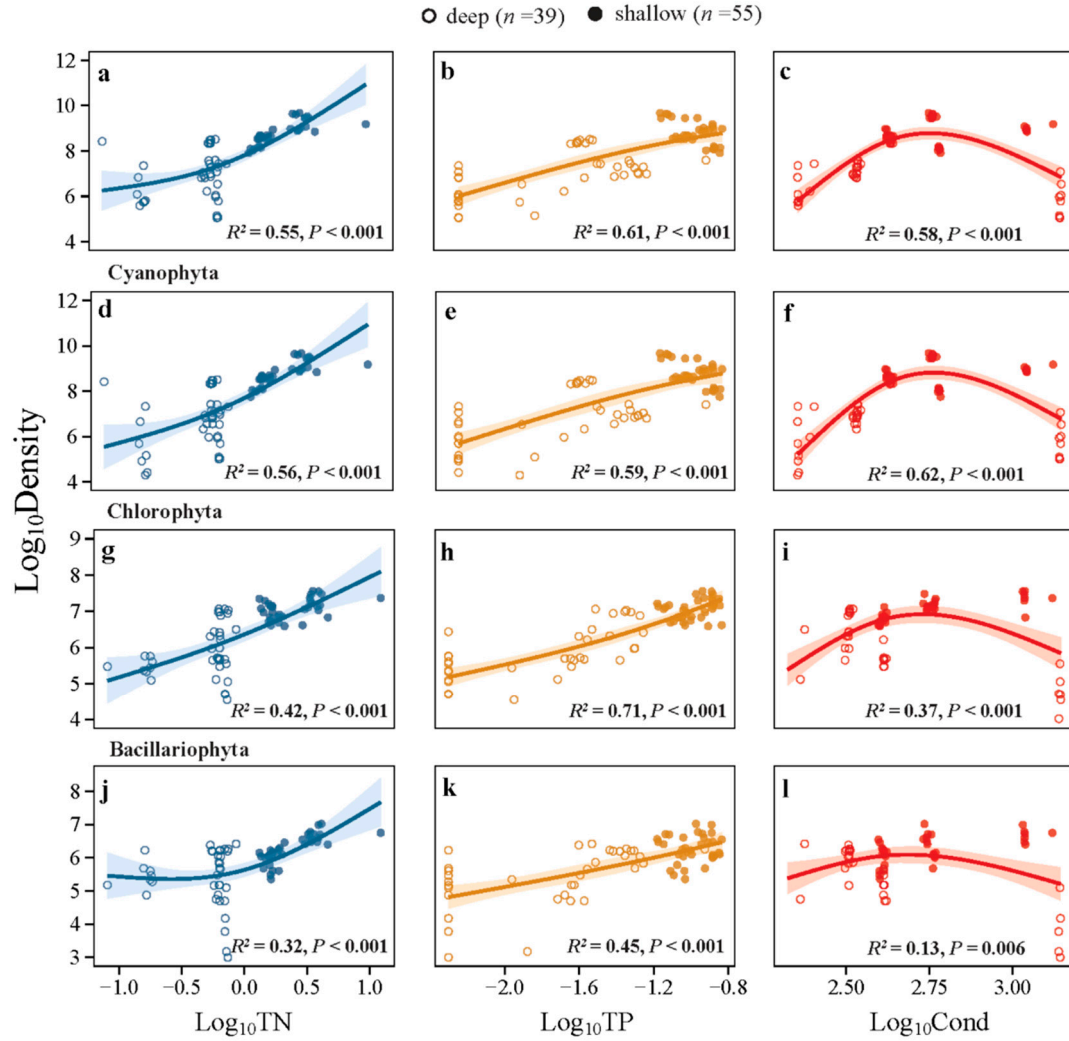

**Figure S6 Generalized additive model showing the summer relationships of TN, TP, and Cond with Density: total (a-c), Cyanophyta (d-f), Chlorophyta (g-i), and Bacillariophyta (j-l) in the studied lakes. See Figure 3 and Table S2 for model parameters used in the classification of deep and shallow lakes.**

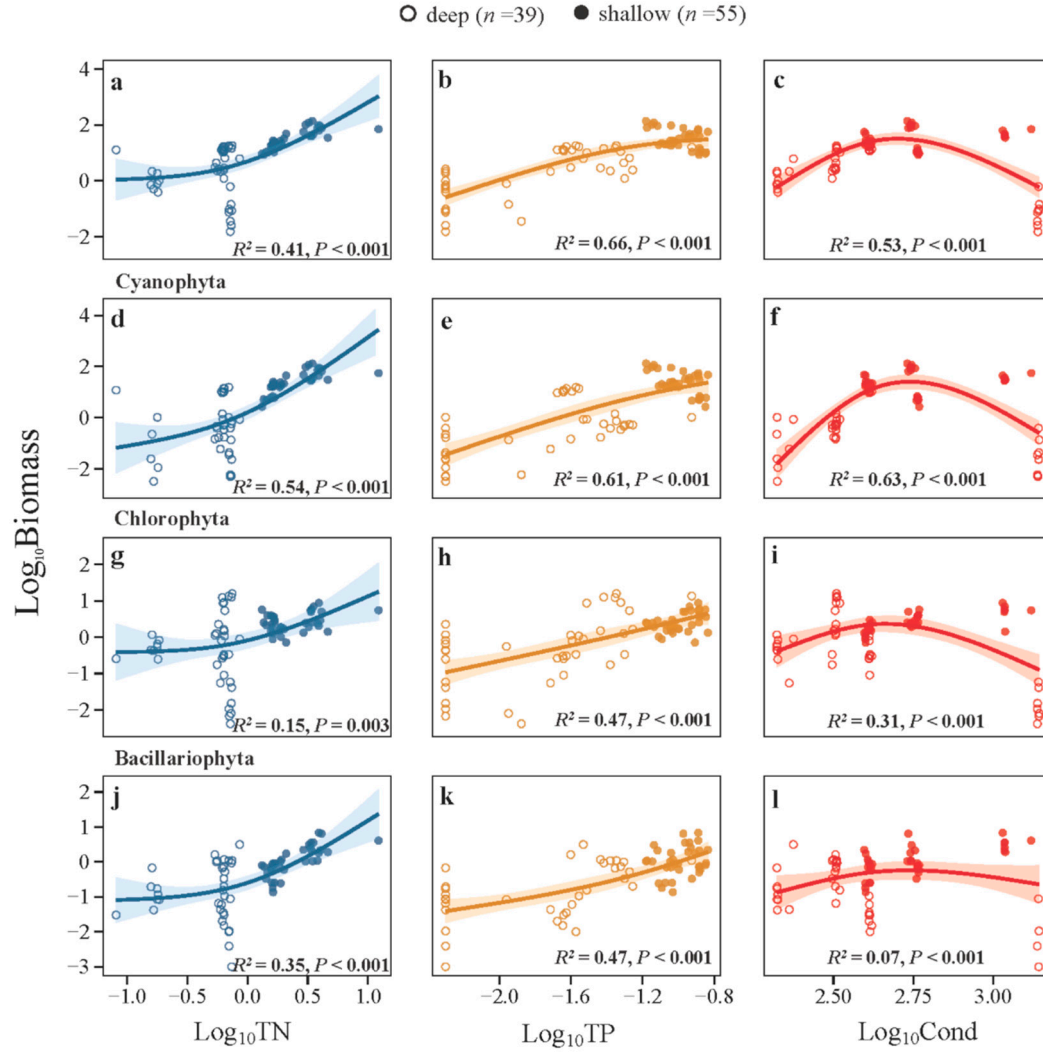

**Figure S7 Generalized additive model showing the summer relationships of TN, TP, and Cond with Biomass: total (a-c), Cyanophyta (d-f), Chlorophyta (g-i), and Bacillariophyta (j-l) in the studied lakes. See Figure 3 and Table S2 for model parameters used in the classification of deep and shallow lakes.**

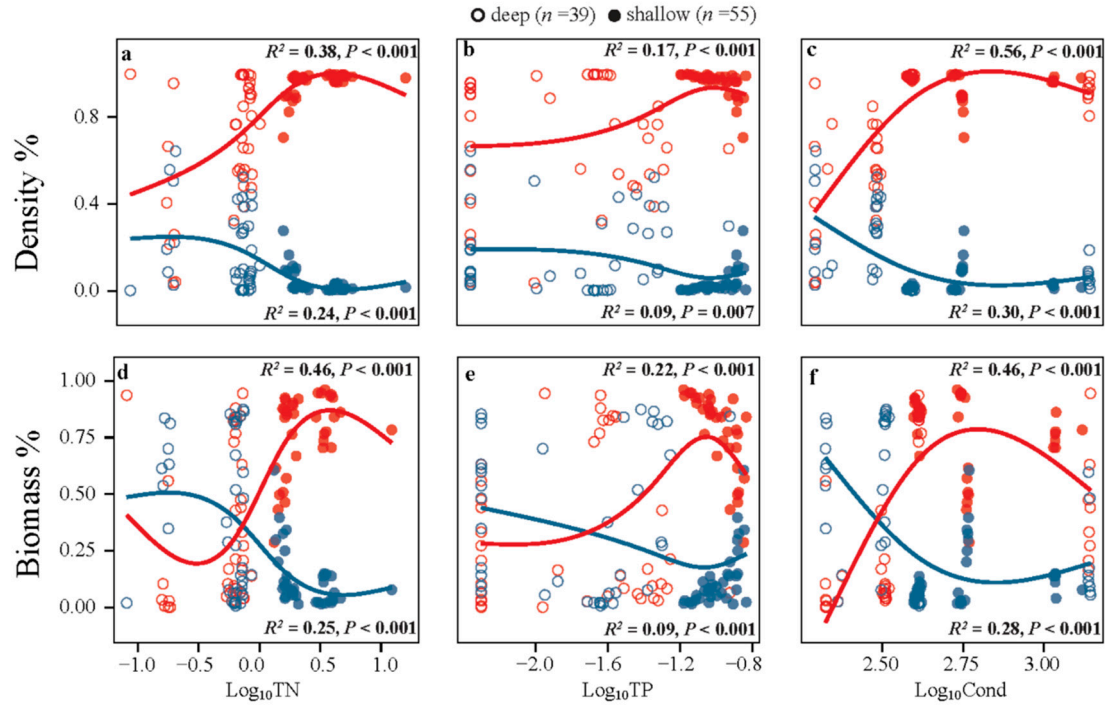

**Figure S8** Generalized additive model measurements of the summer percentage share relationships of TN, TP, and Cond with Density (a-c) and Biomass (d-f) of Cyanophyta and Chlorophyta in the studied lakes. For the classification of deep and shallow lakes see Figure 3 and Table S2 for model parameters.



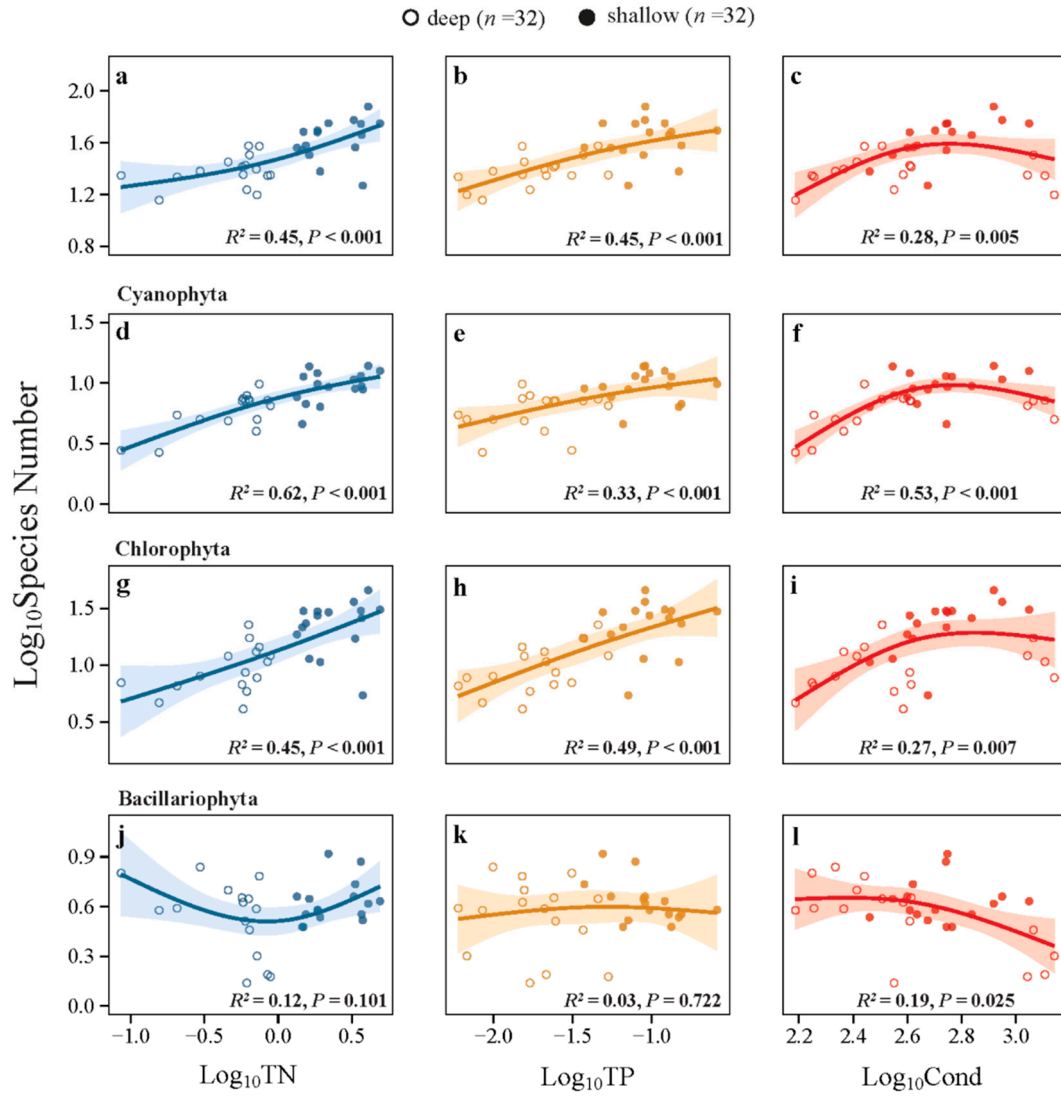

**Figure S9** Generalized additive model of the relationships of TN, TP, and Cond with Species number of total phytoplankton (a-c), Cyanophyta (d-f), Chlorophyta (g-i), and Bacillariophyta (j-l) based on lake-specific data of four seasons in the studied lakes. For the classification of deep and shallow lakes see Figure 3 and Table S3 for model parameters.



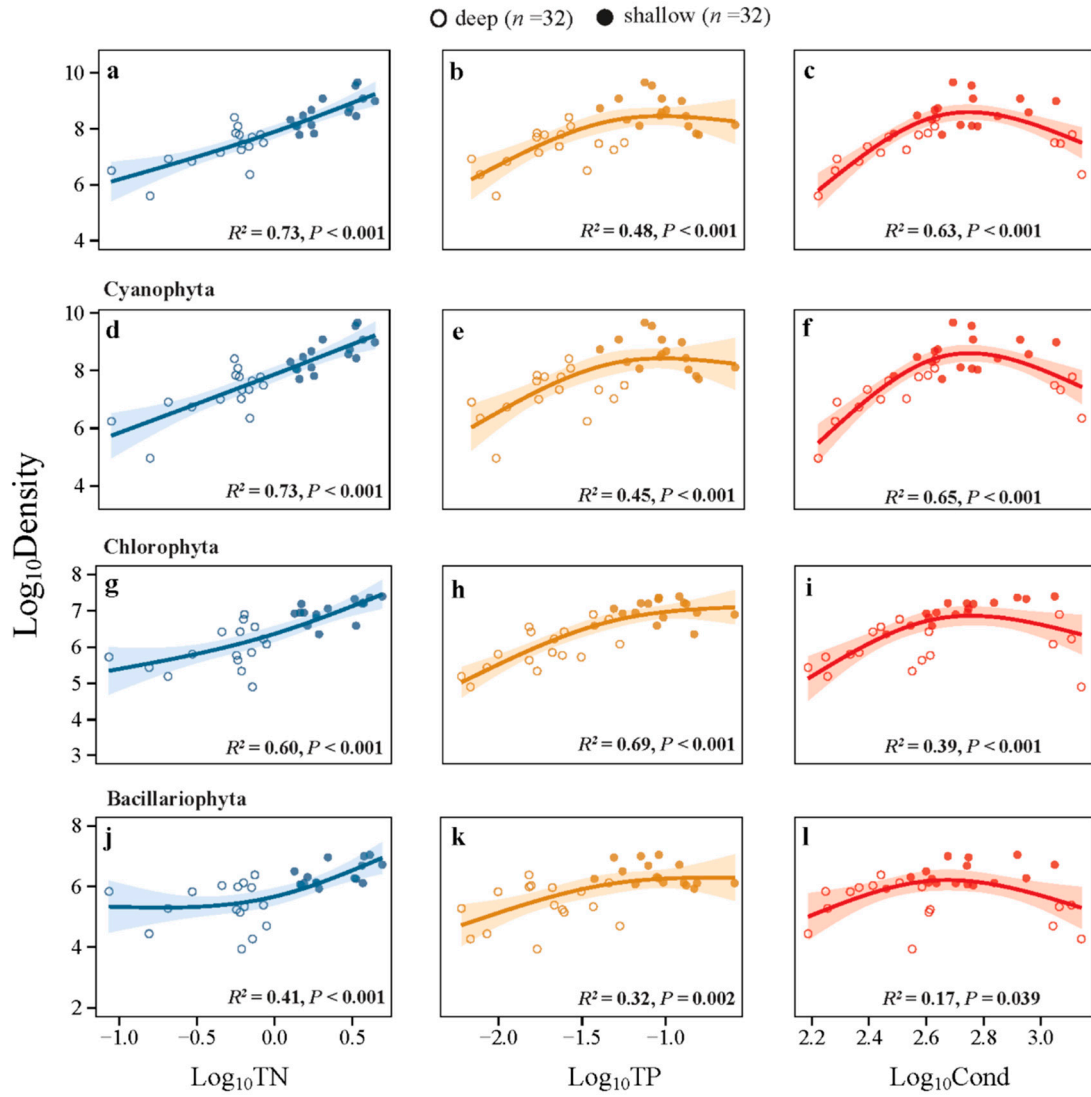

**Figure S10** Generalized additive model of the relationships of TN, TP, and Cond with Density (a-c), total (a-c), Cyanophyta (d-f), Chlorophyta (g-i), and Bacillariophyta (j-l) based on lake-specific data of four seasons in the studied lakes. For the classification of deep and shallow lakes see Figure 3 and Table S3 for model parameters.

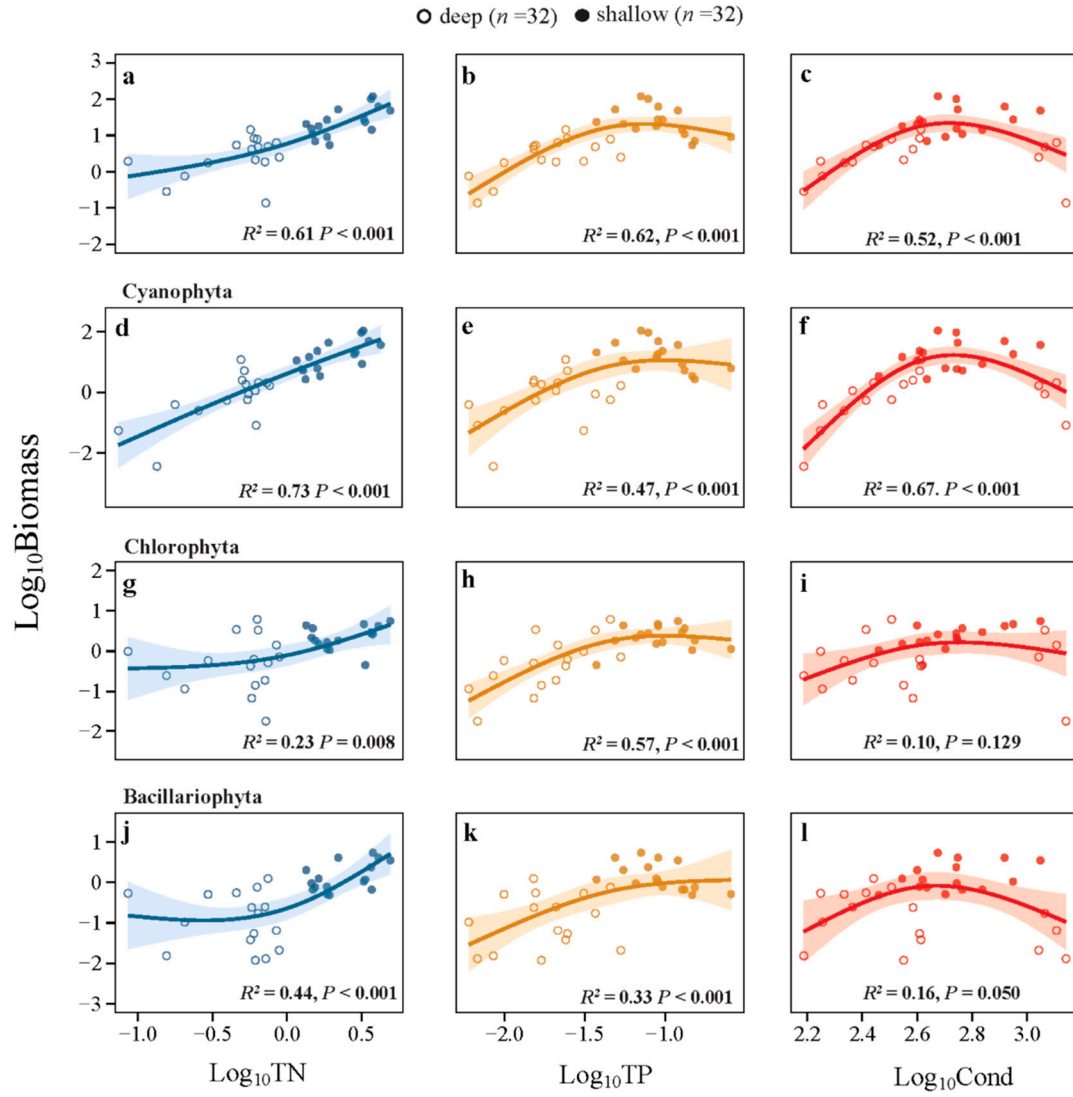

**Figure S11 Generalized additive model of the relationships of TN, TP, and Cond with Biomass (a-c), total (a-c), Cyanophyta (d-f), Chlorophyta (g-i), and Bacillariophyta (j-l) based on lake-specific data of four seasons in the studied lakes. For the classification of deep and shallow lakes see Figure 3 and Table S3 for model parameters.**

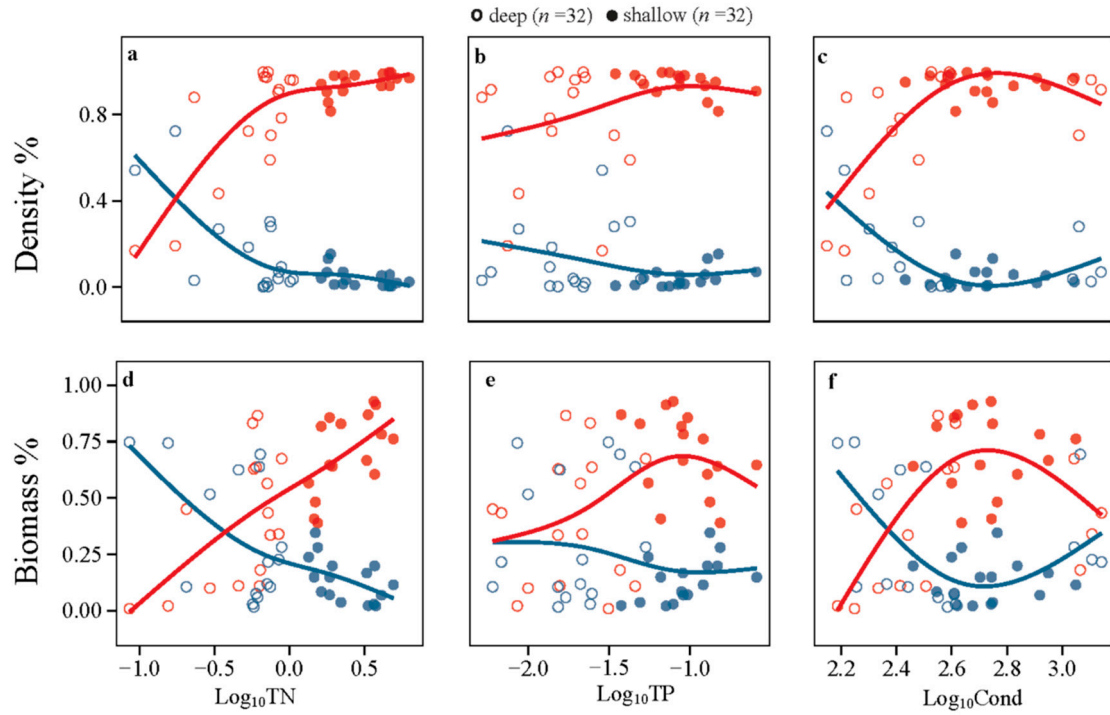

**Figure S12 Generalized additive model measurements of the percentage share relationships of TN, TP, and Cond with Density (a-c) and Biomass (d-f) of Cyanophyta and Chlorophyta based on lake-specific data of four seasons in the studied lakes. For the classification of deep and shallow lakes see Figure 3 and Table S3 for model parameters.**
